# Supplementary material
Source: ML conference proceedings conference paper supplement (https://openaccess.thecvf.com/content/CVPR2023/html/Xie_GP-VTON_Towards_General_CVPR_2023_paper.html)
Supplement: Supplementary file 1 [file Xie_GP-VTON_Towards_General_CVPR_2023_supplemental.pdf]

# Supplementary Material for GP-VTON

Anonymous CVPR submission

Paper ID 3366

## 1. Architecture Details

### 1.1. Local-Flow Global-Parsing Warping Module

Our Local-Flow Global-Parsing Warping Module is composed of two Feature Pyramid Network (FPN) [10] (i.e.,  $\mathcal{E}_p$  and  $\mathcal{E}_g$ ) and a cascade flow estimation module which consists of five LFQP blocks. We provide the detailed architecture of the FPN and the LFQP block in Tab. 1 and Tab. 2, respectively. Note, for  $\mathcal{E}_p$ , it takes as inputs a 25-channel densepose [5], a 25-channel 2D pose map [2], and a 1-channel preserved mask, resulting in a 51-channel input tensor. For  $\mathcal{E}_g$ , it takes as inputs a 3-channel garment image and a 1-channel garment parsing, resulting in a 4-channel input tensor. For the LFQP block, we take the block with lowest resolution as example, which receives the incoming feature with the resolution  $16 \times 12$ , and outputs the local flow with resolution  $16 \times 12$  and garment parsing with the resolution  $32 \times 24$ .

### 1.2. Generator

Our try-on generator  $\mathcal{G}$  inherits the Res-UNet [12] architecture. We provide the architecture details in Tab. 3. Note, the output of  $\mathcal{G}$  is a 4-channel tensor, which is further split into a 3-channel coarse try-on result  $I'_c$  and a 1-channel alpha mask  $M_c$ . The final try-on result  $I'$  is obtained by using  $M_c$  to fuse  $I'_c$  and the warped garment  $G'$ , which can be formulated as:

$$I' = G' \odot M_c + I'_c \odot (1 - M_c). \quad (1)$$

## 2. Experiments Details

### 2.1. Loss Functions

During training, we train the LFQP warping module and the generator separately. For the LFQP warping module, we calculate the  $l_1$  loss  $\mathcal{L}_1$  and perceptual loss [7]  $\mathcal{L}_{per}$  between the local warped parts  $\{G'^k\}_{k=1}^3$  and their corresponding ground truth  $\{G_{gt}^k\}_{k=1}^3$ , which can be formulated as:

$$\mathcal{L}_1 = \sum_{k=1}^3 \|G'^k - G_{gt}^k\|_1, \quad (2)$$

$$\mathcal{L}_{perc} = \sum_{k=1}^3 \sum_{j=1}^5 \lambda_j \|\phi_j(G'^k) - \phi_j(G_{gt}^k)\|_1, \quad (3)$$

where  $\phi_j(*)$  denotes the  $j$ -th feature map in a pre-trained VGG network [13]. We also utilize the  $l_1$  loss  $\mathcal{L}_m$  for the local warped masks, and the pixel-wise cross-entropy loss  $\mathcal{L}_{ce}$  and the adversarial loss  $\mathcal{L}_{adv}$  for the global garment parsing. Besides, we follow PFAFN [4] and employ the second-order smooth loss  $\mathcal{L}_{sec}$  on the local flows  $\{f^k\}_{k=1}^3$ . The total loss for the LFQP module can be formulated as:

$$\mathcal{L}^w = \mathcal{L}_1^w + \lambda_{per}^w \mathcal{L}_{per}^w + \lambda_m^w \mathcal{L}_m^w + \lambda_{ce} \mathcal{L}_{ce} + \lambda_{adv}^w \mathcal{L}_{adv}^w + \lambda_{sec} \mathcal{L}_{sec}, \quad (4)$$

where  $\lambda_{per}^w$ ,  $\lambda_m^w$ ,  $\lambda_{ce}$ ,  $\lambda_{adv}^w$  and  $\lambda_{sec}$  are the trade-off hyper-parameters, which are set to 0.2, 2.0, 0.5, 0.1, and 6.0, respectively.

For the generator, we utilize  $l_1$  loss  $\mathcal{L}_1$ , the perceptual loss [7]  $\mathcal{L}_{per}$ , and the adversarial loss for the try-on result  $I'$ , and also utilize the  $l_1$  loss  $\mathcal{L}_m$  for the alpha mask  $M_c$ . The total loss is defined as follows:

$$\mathcal{L}^g = \mathcal{L}_{per}^g + \lambda_{\mathcal{L}_1}^g \mathcal{L}_1^g + \lambda_{adv}^g \mathcal{L}_{adv}^g + \lambda_m^g \mathcal{L}_m^g, \quad (5)$$

where  $\lambda_{\mathcal{L}_1}^g$ ,  $\lambda_{adv}^g$  and  $\lambda_m^g$  are the hyper-parameters, which are set to 5.0, 0.5, and 5.0, respectively.

### 2.2. Implementation Details

The training process for both dataset are the same, which include a two-stage training procedure and are trained on 8 Tesla V100 GPUs. During training LFQP warping module, the batch size is set to 2 for each GPU and the model is trained for 120 epochs with learning rate 5e-5, in which the DGT strategy is only employed for the last 50 epochs. During training the generator, the batch size is set to 16 for each GPU and the model is trained for 200 epochs with learning rate 5e-4. Both LFQP warping module and the generator employ the Adam optimizer [8] with  $\beta_1 = 0.5$  and  $\beta_2 = 0.999$ .

### 2.3. Human Evaluation Details

For human evaluation, we separately design two questionnaires for the VITON-HD dataset [3], and DressCode

dataset [11]. Specifically, for the VITON-HD dataset, 40 volunteers are invited to complete the questionnaire which is composed of 25 assignments. For the DressCode dataset, 20 volunteers are invited to complete the questionnaire which contains 15 assignments for each garment category (i.e., upper-, lower-garment, dresses), namely, 45 assignments in total. For each assignment in the questionnaire, given a person image and a garment image, the volunteers are asked to select the most realistic and accurate try-on result out of five options, which are generated by our GP-VTON and the baseline methods (i.e., PF-AFN [4], FS-VTON [6], HRVITON [9], SDAFN [1]). Besides, the order of the generated results in each assignment are randomly shuffled. Fig. 2 shows the interface of the questionnaire for the VITON-HD dataset. The interface for the DressCode dataset is identical. Please refer to Sec.4.2 in the main text for the detailed quantitative results of the human evaluation.

### 3. Additional Results

**Visual Comparisons with SOTAs on VITON-HD dataset [3].** Fig. 3 displays additional visual comparisons among GP-VTON and the baseline methods on the VITON-HD dataset.

**Visual Comparisons with SOTAs on DressCode dataset [11].** Fig. 4, Fig. 5, and Fig. 6 display additional visual comparisons among GP-VTON and the baseline methods on the upper, lower and dresses subset of the DressCode dataset, respectively.

**Virtual Try-on for FIFA World Cup Qatar 2022.** We also test our GP-VTON in the jersey try-on scenario for FIFA World Cup Qatar 2022, where the garment images are jerseys from different countries that we can acquire in the Internet, and the person image are from the VITON-HD dataset [3]. Please refer to Fig. 7 for the visual results.

### 4. Potential Social Impacts and Limitations

**Potential social impacts.** As with most generative models, our GP-VTON might be applied to malicious image manipulations, such as transferring weird garment onto specific person without permission. Nevertheless, such negative impact could be alleviated via forensics analysis and other manipulation detection methods.

**Limitations.** Since our GP-VTON conducts local warping for different garment parts individually, it would fail to obtain accurate warped result when the input in-shop garment is incomplete. As shown in Fig. 1 (A), the right sleeve of the input garment is invisible, GP-VTON fails to generate compelling result in the arm region. Besides, GP-VTON is unable to address the parsing error. As show in Fig. 1 (B), the wrong human parsing result of the lower body leads to the incorrect preserved region, which further influences the shape of the warped garment and the visual quality of the

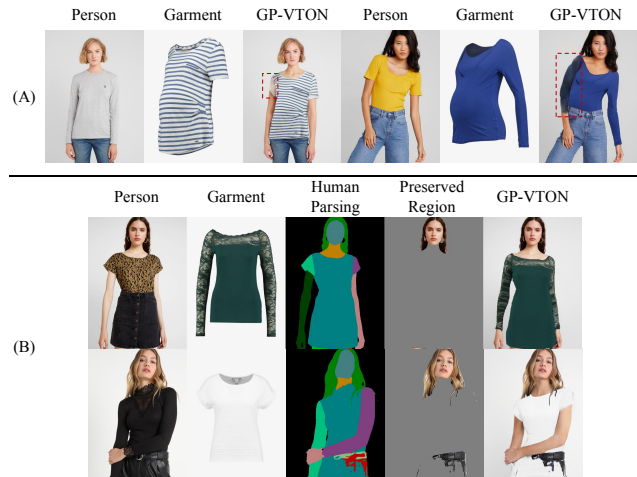

Figure 1. Failure cases of our GP-VTON. Please zoom in for more details.

try-on results. To alleviate the influence of the parsing error, we could resort to the knowledge distillation mechanism, which is commonly used in [4, 6], to obtain a parsing-free model.

### References

- [1] Shuai Bai, Huiling Zhou, Zhikang Li, Chang Zhou, and Hongxia Yang. Single stage virtual try-on via deformable attention flows. In *ECCV*, 2022. 2
- [2] Z. Cao, G. Hidalgo, T. Simon, S. Wei, and Y. Sheikh. Openpose: Realtime multi-person 2d pose estimation using part affinity fields. *TPAMI*, 43(01):172–186, 2021. 1
- [3] Seunghwan Choi, Sunghyun Park, Minsoo Lee, and Jaegul Choo. Viton-hd: High-resolution virtual try-on via misalignment-aware normalization. In *CVPR*, pages 14131–14140, 2021. 1, 2, 3, 4
- [4] Yuying Ge, Yibing Song, Ruimao Zhang, Chongjian Ge, Wei Liu, and Ping Luo. Parser-free virtual try-on via distilling appearance flows. In *CVPR*, pages 8485–8493, 2021. 1, 2
- [5] Riza Alp Güler, Natalia Neverova, and Iasonas Kokkinos. Densepose: Dense human pose estimation in the wild. In *CVPR*, pages 7297–7306, 2018. 1
- [6] Sen He, Yi-Zhe Song, and Tao Xiang. Style-based global appearance flow for virtual try-on. In *CVPR*, pages 3470–3479, 2022. 2
- [7] Justin Johnson, Alexandre Alahi, and Li Fei-Fei. Perceptual losses for real-time style transfer and super-resolution. In *ECCV*, pages 694–711, 2016. 1
- [8] Diederik P. Kingma and Jimmy Ba. Adam: A method for stochastic optimization. In *ICLR*, 2015. 1
- [9] Sangyun Lee, Gyojung Gu, Sunghyun Park, Seunghwan Choi, and Jaegul Choo. High-resolution virtual try-on with misalignment and occlusion-handled conditions. In *ECCV*, 2022. 2
- [10] Tsung-Yi Lin, Piotr Dollar, Ross Girshick, Kaiming He, Bharath Hariharan, and Serge Belongie. Feature pyramid

\*7. Given the Person image and the Garment image, please select the most **realistic** and **accurate** try-on results from the following options. (Realistic: look real. Accurate: preserve garment details, i.g., garment shape and garment texture of the given garment image)

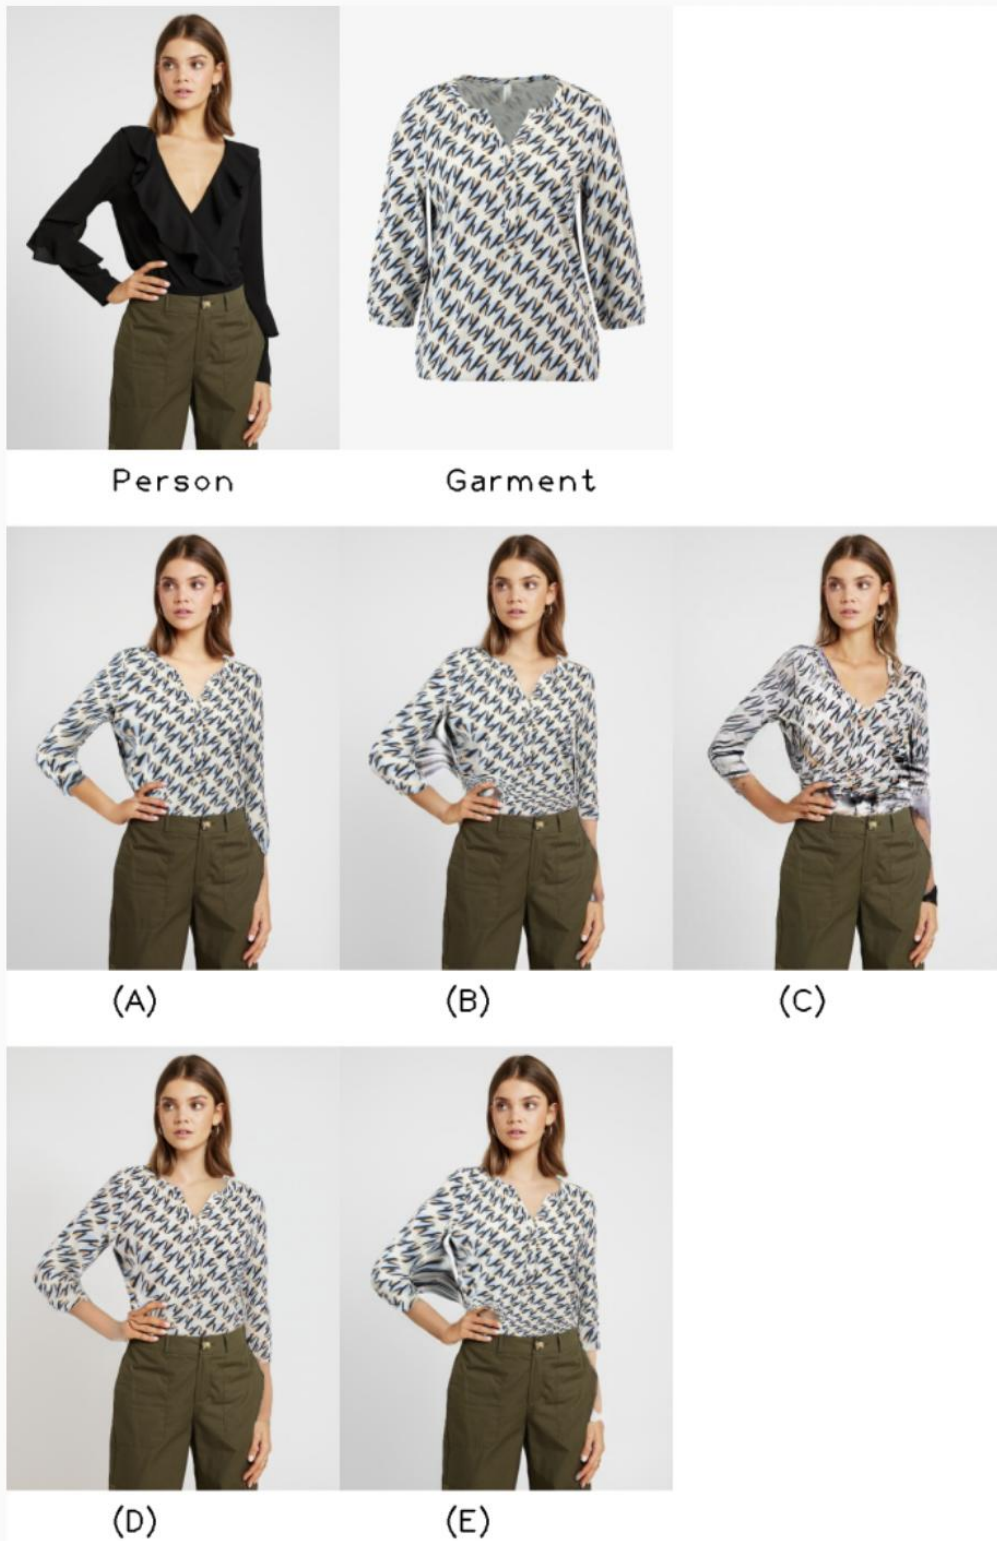

Figure 2. Interface of the questionnaire used to evaluate the final try-on results on the VITON-HD dataset [3].

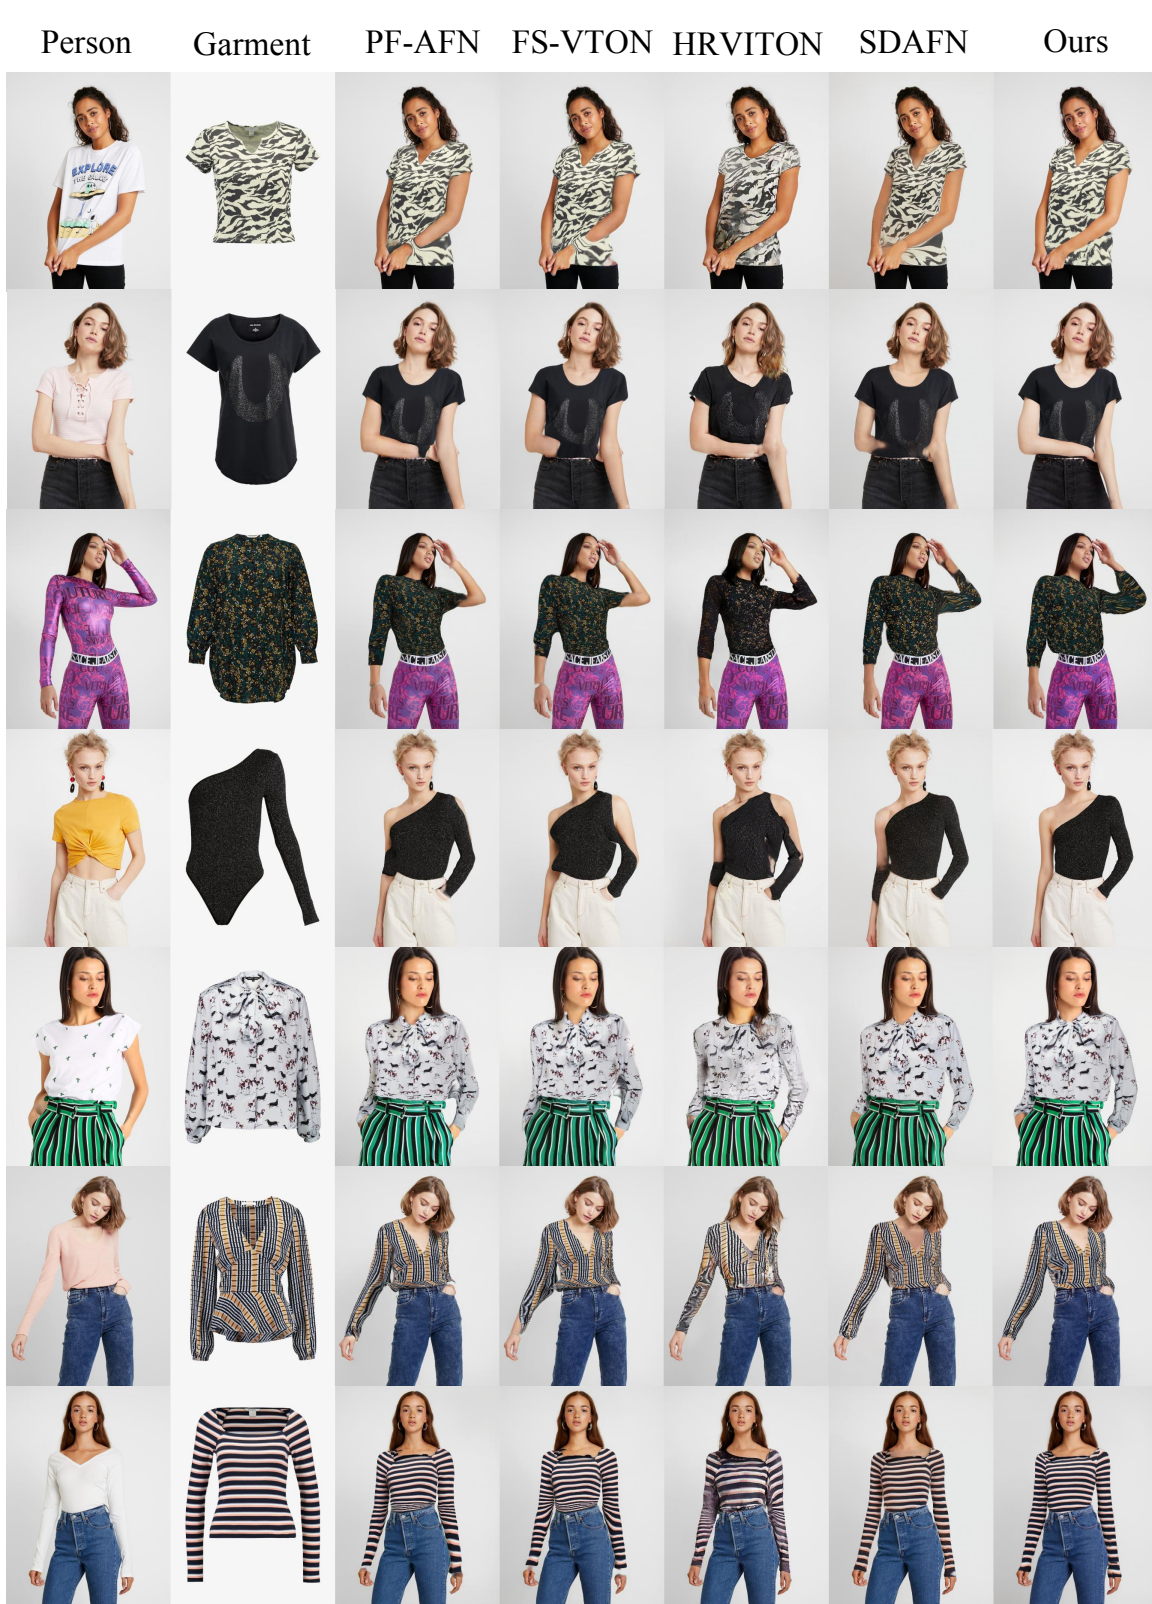

378  
379  
380  
381  
382  
383  
384  
385  
386  
387  
388  
389  
390  
391  
392  
393  
394  
395  
396  
397  
398  
399  
400  
401  
402  
403  
404  
405  
406  
407  
408  
409  
410  
411  
412  
413  
414  
415  
416  
417  
418  
419  
420  
421  
422  
423  
424  
425  
426  
427  
428  
429  
430  
431

Figure 3. Qualitative comparison on the VITON-HD dataset [3]. Please zoom in for more details.

432  
433  
434  
435  
436  
437  
438  
439  
440  
441  
442  
443  
444  
445  
446  
447  
448  
449  
450  
451  
452  
453  
454  
455  
456  
457  
458  
459  
460  
461  
462  
463  
464  
465  
466  
467  
468  
469  
470  
471  
472  
473  
474  
475  
476  
477  
478  
479  
480  
481  
482  
483  
484  
485

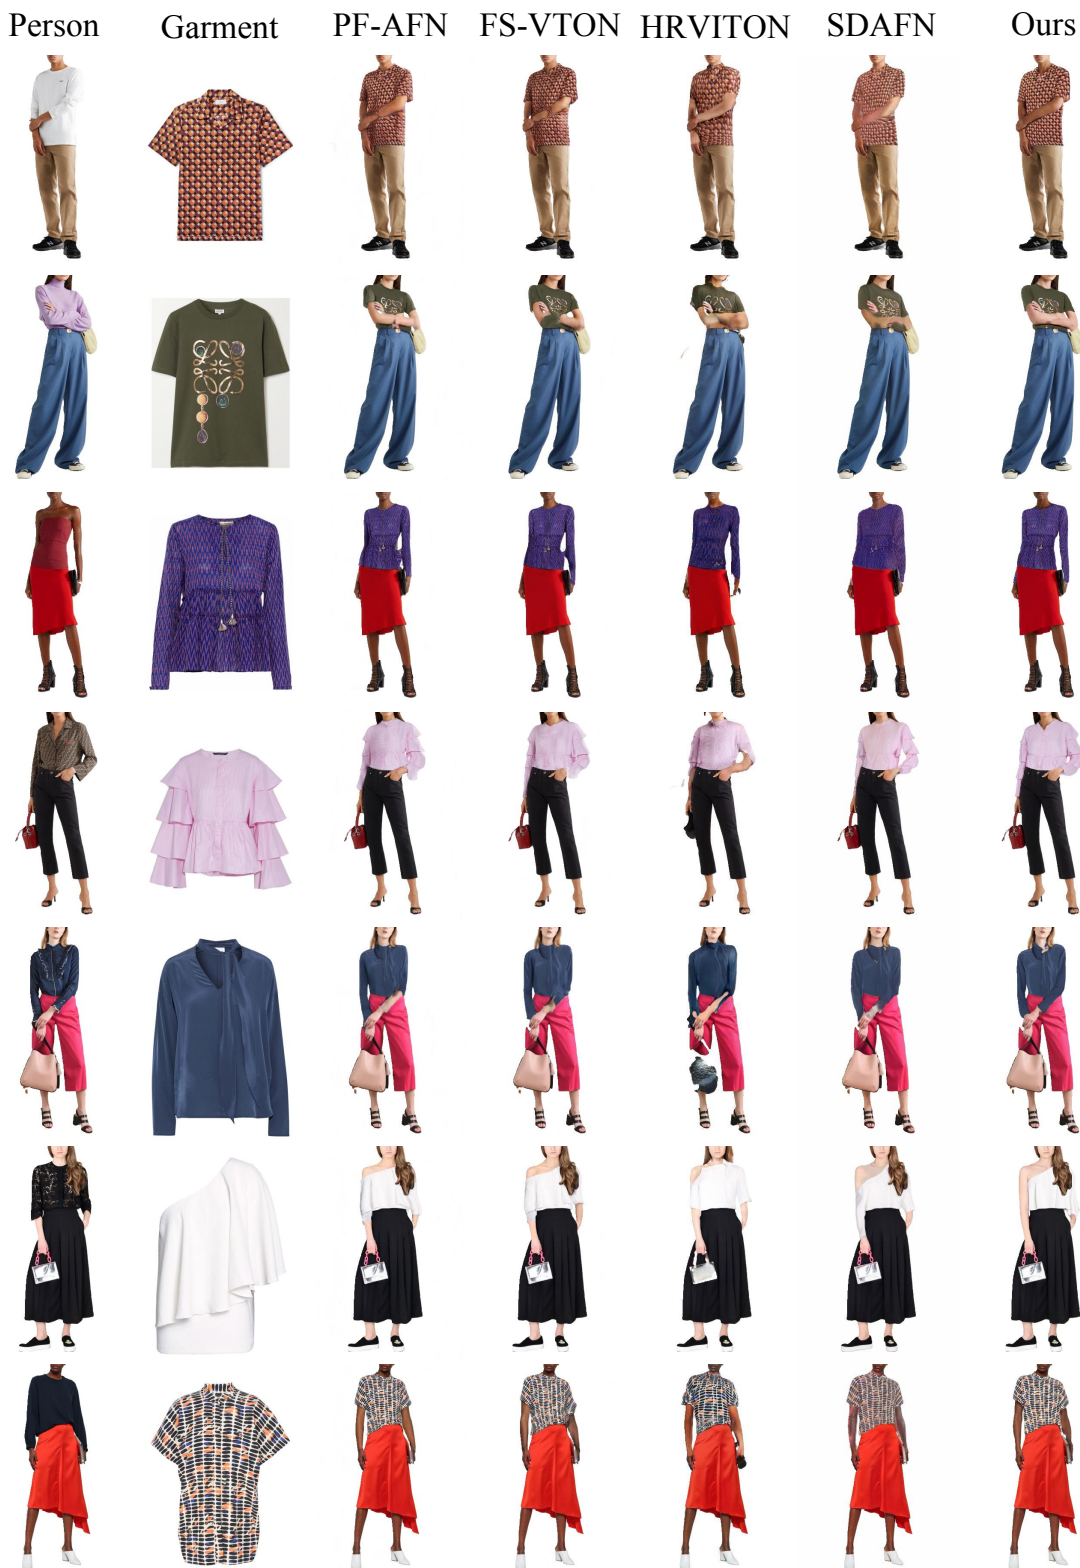

486  
487  
488  
489  
490  
491  
492  
493  
494  
495  
496  
497  
498  
499  
500  
501  
502  
503  
504  
505  
506  
507  
508  
509  
510  
511  
512  
513  
514  
515  
516  
517  
518  
519  
520  
521  
522  
523  
524  
525  
526  
527  
528  
529  
530  
531  
532  
533  
534  
535  
536  
537  
538  
539

Figure 4. Qualitative comparison on the upper subset of the DressCode dataset [11]. Please zoom in for more details.

540  
541  
542  
543  
544  
545  
546  
547  
548  
549  
550  
551  
552  
553  
554  
555  
556  
557  
558  
559  
560  
561  
562  
563  
564  
565  
566  
567  
568  
569  
570  
571  
572  
573  
574  
575  
576  
577  
578  
579  
580  
581  
582  
583  
584  
585  
586  
587  
588  
589  
590  
591  
592  
593

594  
595  
596  
597  
598  
599  
600  
601  
602  
603  
604  
605  
606  
607  
608  
609  
610  
611  
612  
613  
614  
615  
616  
617  
618  
619  
620  
621  
622  
623  
624  
625  
626  
627  
628  
629  
630  
631  
632  
633  
634  
635  
636  
637  
638  
639  
640  
641  
642  
643  
644  
645  
646  
647

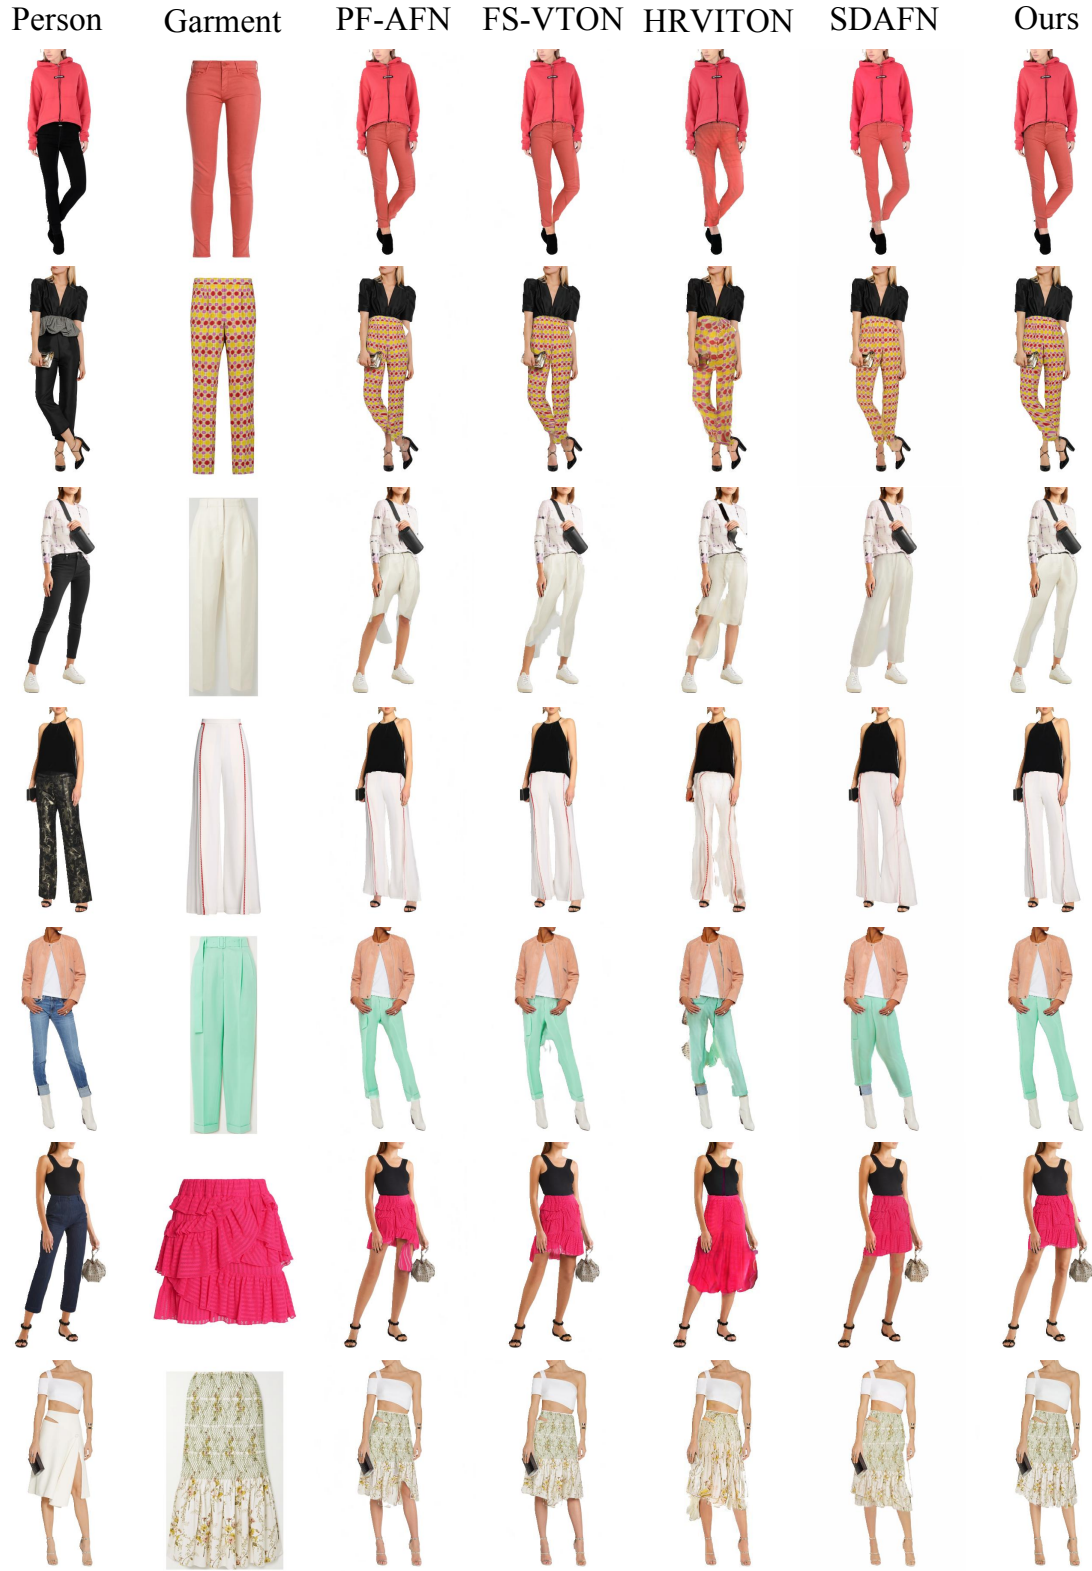

Figure 5. Qualitative comparison on the lower subset of the DressCode dataset [11]. Please zoom in for more details.

648  
649  
650  
651  
652  
653  
654  
655  
656  
657  
658  
659  
660  
661  
662  
663  
664  
665  
666  
667  
668  
669  
670  
671  
672  
673  
674  
675  
676  
677  
678  
679  
680  
681  
682  
683  
684  
685  
686  
687  
688  
689  
690  
691  
692  
693  
694  
695  
696  
697  
698  
699  
700  
701

702  
703  
704  
705  
706  
707  
708  
709  
710  
711  
712  
713  
714  
715  
716  
717  
718  
719  
720  
721  
722  
723  
724  
725  
726  
727  
728  
729  
730  
731  
732  
733  
734  
735  
736  
737  
738  
739  
740  
741  
742  
743  
744  
745  
746  
747  
748  
749  
750  
751  
752  
753  
754  
755

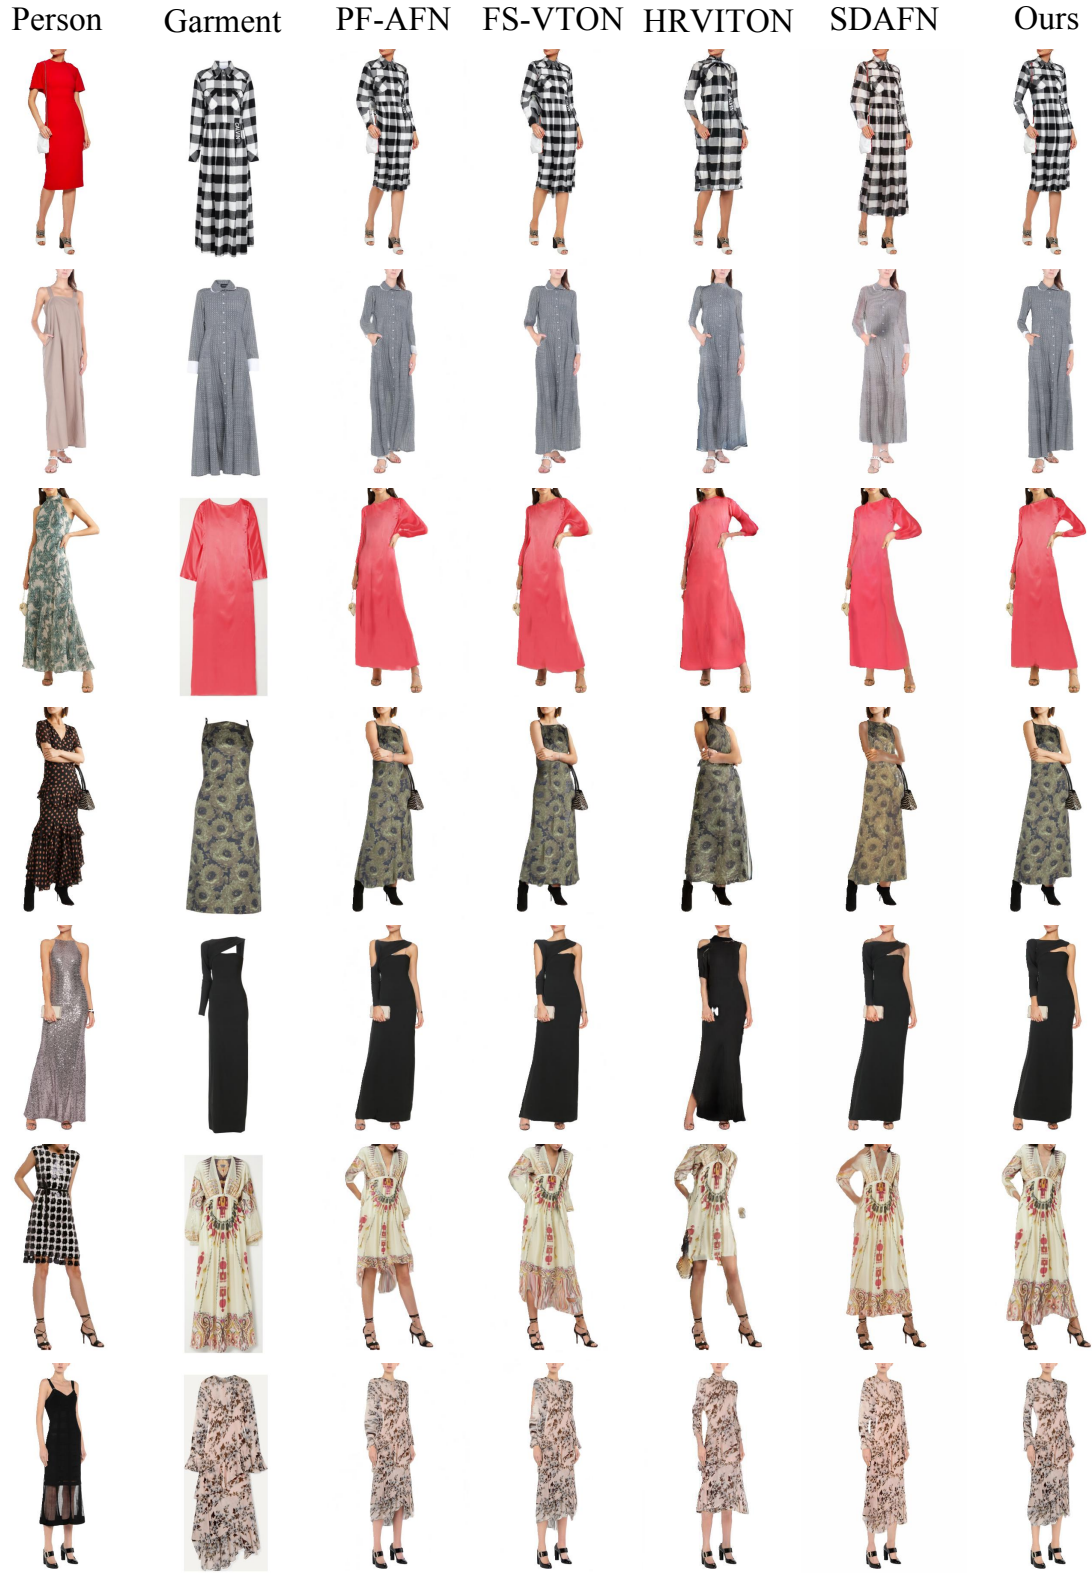

Figure 6. Qualitative comparison on the dresses subset of the DressCode dataset [11]. Please zoom in for more details.

756  
757  
758  
759  
760  
761  
762  
763  
764  
765  
766  
767  
768  
769  
770  
771  
772  
773  
774  
775  
776  
777  
778  
779  
780  
781  
782  
783  
784  
785  
786  
787  
788  
789  
790  
791  
792  
793  
794  
795  
796  
797  
798  
799  
800  
801  
802  
803  
804  
805  
806  
807  
808  
809

810  
811  
812  
813  
814  
815  
816  
817  
818  
819  
820  
821  
822  
823  
824  
825  
826  
827  
828  
829  
830  
831  
832  
833  
834  
835  
836  
837  
838  
839  
840  
841  
842  
843  
844  
845  
846  
847  
848  
849  
850  
851  
852  
853  
854  
855  
856  
857  
858  
859  
860  
861  
862  
863

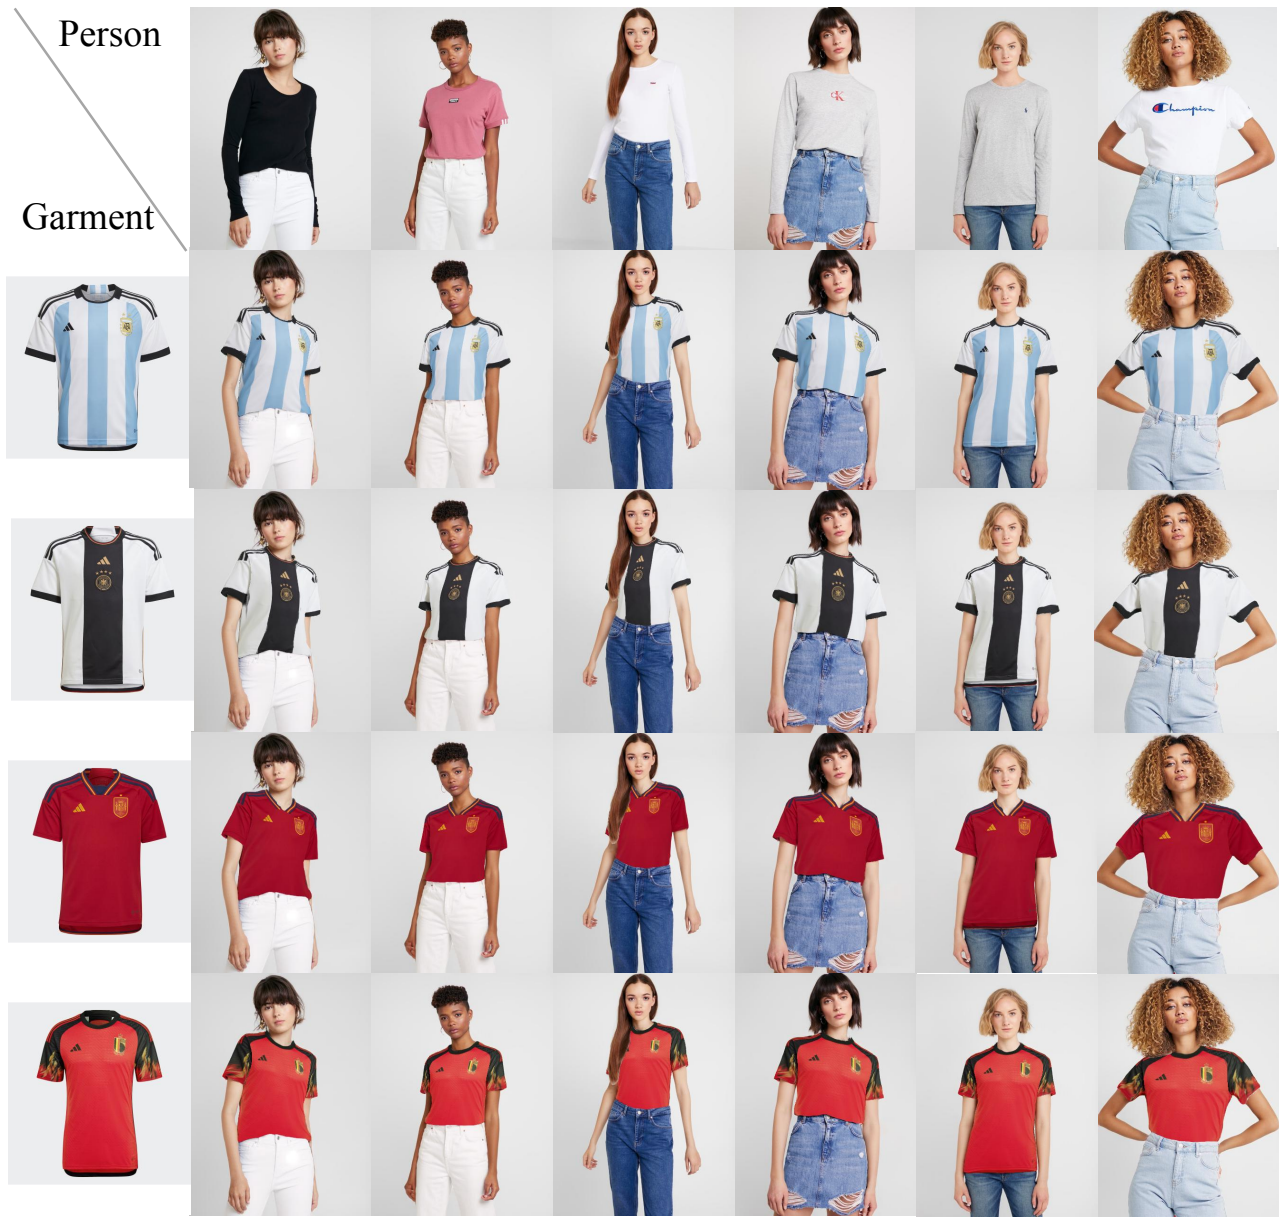

Figure 7. Virtual try-on results for FIFA World Cup Qatar 2022. Please zoom in for more details.

- networks for object detection. In *CVPR*, pages 2117–2125, 2017. 1
- [11] Davide Morelli, Matteo Fincato, Marcella Cornia, Federico Landi, Fabio Cesari, and Rita Cucchiara. Dress Code: High-Resolution Multi-Category Virtual Try-On. In *ECCV*, 2022. 2, 5, 6, 7
- [12] Olaf Ronneberger, Philipp Fischer, and Thomas Brox. U-net: Convolutional networks for biomedical image segmentation. In *MICCAI*, pages 234–241, 2015. 1
- [13] Karen Simonyan and Andrew Zisserman. Very deep convolutional networks for large-scale image recognition. In Yoshua Bengio and Yann LeCun, editors, *ICLR*, 2015. 1



| $\mathcal{E}_p(\mathcal{E}_g)$ |                 |                                                     |                 |             |
|--------------------------------|-----------------|-----------------------------------------------------|-----------------|-------------|
| Layer                          | Operation       | Output Size                                         |                 |             |
| Feature Encoder                | Input           | -                                                   | (512,384,51(4)) |             |
|                                | Conv 1-1        | InstanceNorm, ReLU, Conv2d 3×3                      | (256,192,64)    |             |
|                                | Res 1-1         | Residual Block (InstanceNorm, ReLU, Conv2d 3×3)     | (256,192,64)    |             |
|                                | Res 1-2         | Residual Block (InstanceNorm, ReLU, Conv2d 3×3)     | (256,192,64)    |             |
|                                | Conv 2-1        | InstanceNorm, ReLU, Conv2d 3×3                      | (128,96,128)    |             |
|                                | Res 2-1         | Residual Block (InstanceNorm, ReLU, Conv2d 3×3)     | (128,96,128)    |             |
|                                | Res 2-2         | Residual Block (InstanceNorm, ReLU, Conv2d 3×3)     | (128,96,128)    |             |
|                                | Conv 3-1        | InstanceNorm, ReLU, Conv2d 3×3                      | (64,48,256)     |             |
|                                | Res 3-1         | Residual Block (InstanceNorm, ReLU, Conv2d 3×3)     | (64,48,256)     |             |
|                                | Res 3-2         | Residual Block (InstanceNorm, ReLU, Conv2d 3×3)     | (64,48,256)     |             |
|                                | Conv 4-1        | InstanceNorm, ReLU, Conv2d 3×3                      | (32,24,256)     |             |
|                                | Res 4-1         | Residual Block (InstanceNorm, ReLU, Conv2d 3×3)     | (32,24,256)     |             |
|                                | Res 4-2         | Residual Block (InstanceNorm, ReLU, Conv2d 3×3)     | (32,24,256)     |             |
|                                | Conv 5-1        | InstanceNorm, ReLU, Conv2d 3×3                      | (16,12,256)     |             |
|                                | Res 5-1         | Residual Block (InstanceNorm, ReLU, Conv2d 3×3)     | (16,12,256)     |             |
|                                | Res 5-2         | Residual Block (InstanceNorm, ReLU, Conv2d 3×3)     | (16,12,256)     |             |
|                                | Pyramid Encoder | Conv 6-1                                            | Conv2d 1×1      | (16,12,256) |
|                                |                 | Conv 6-2                                            | Conv2d 3×3      | (16,12,256) |
| Upsample 7-1                   |                 | Interpolation(scale-factor=2)                       | (32,24,256)     |             |
| Skip Connection 7-1            |                 | Skip Connection from Res 4-2 (Conv2d 1×1, Addition) | (32,24,256)     |             |
| Conv 7-1                       |                 | Conv2d 3×3                                          | (32,24,256)     |             |
| Upsample 8-1                   |                 | Interpolation(scale-factor=2)                       | (64,48,256)     |             |
| Skip Connection 8-1            |                 | Skip Connection from Res 3-2 (Conv2d 1×1, Addition) | (64,48,256)     |             |
| Conv 8-1                       |                 | Conv2d 3×3                                          | (64,48,256)     |             |
| Upsample 9-1                   |                 | Interpolation(scale-factor=2)                       | (128,96,256)    |             |
| Skip Connection 9-1            |                 | Skip Connection from Res 2-2 (Conv2d 1×1, Addition) | (128,96,256)    |             |
| Conv 9-1                       |                 | Conv2d 3×3                                          | (128,96,256)    |             |
| Upsample 10-1                  |                 | Interpolation(scale-factor=2)                       | (256,128,256)   |             |
| Skip Connection 10-1           |                 | Skip Connection from Res 1-2 (Conv2d 1×1, Addition) | (256,128,256)   |             |
| Conv 10-1                      | Conv2d 3×3      | (256,128,256)                                       |                 |             |

Table 1. The architecture details of the FPN ( $\mathcal{E}_p(\mathcal{E}_g)$ ).

| LFGP Block           |                     |           |                                                     |             |
|----------------------|---------------------|-----------|-----------------------------------------------------|-------------|
| Layer                |                     | Operation |                                                     | Output Size |
| Coarse Flow Block    | Left Flow Block-1   | Conv 1-1  | Conv2d $3 \times 3$ , LeakyReLU(negative-slope=0.1) | (16,12,128) |
|                      |                     | Conv 1-2  | Conv2d $3 \times 3$ , LeakyReLU(negative-slope=0.1) | (16,12,64)  |
|                      |                     | Conv 1-3  | Conv2d $3 \times 3$ , LeakyReLU(negative-slope=0.1) | (16,12,32)  |
|                      |                     | Conv 1-4  | Conv2d $3 \times 3$                                 | (16,12,2)   |
|                      | Middle Flow Block-1 | Conv 2-1  | Conv2d $3 \times 3$ , LeakyReLU(negative-slope=0.1) | (16,12,128) |
|                      |                     | Conv 2-2  | Conv2d $3 \times 3$ , LeakyReLU(negative-slope=0.1) | (16,12,64)  |
|                      |                     | Conv 2-3  | Conv2d $3 \times 3$ , LeakyReLU(negative-slope=0.1) | (16,12,32)  |
|                      |                     | Conv 2-4  | Conv2d $3 \times 3$                                 | (16,12,2)   |
|                      | Right Flow Block-1  | Conv 3-1  | Conv2d $3 \times 3$ , LeakyReLU(negative-slope=0.1) | (16,12,128) |
|                      |                     | Conv 3-2  | Conv2d $3 \times 3$ , LeakyReLU(negative-slope=0.1) | (16,12,64)  |
|                      |                     | Conv 3-3  | Conv2d $3 \times 3$ , LeakyReLU(negative-slope=0.1) | (16,12,32)  |
|                      |                     | Conv 3-4  | Conv2d $3 \times 3$                                 | (16,12,2)   |
| Fine Flow Block      | Left Flow Block-2   | Conv 4-1  | Conv2d $3 \times 3$ , LeakyReLU(negative-slope=0.1) | (16,12,128) |
|                      |                     | Conv 4-2  | Conv2d $3 \times 3$ , LeakyReLU(negative-slope=0.1) | (16,12,64)  |
|                      |                     | Conv 4-3  | Conv2d $3 \times 3$ , LeakyReLU(negative-slope=0.1) | (16,12,32)  |
|                      |                     | Conv 4-4  | Conv2d $3 \times 3$                                 | (16,12,2)   |
|                      | Middle Flow Block-2 | Conv 5-1  | Conv2d $3 \times 3$ , LeakyReLU(negative-slope=0.1) | (16,12,128) |
|                      |                     | Conv 5-2  | Conv2d $3 \times 3$ , LeakyReLU(negative-slope=0.1) | (16,12,64)  |
|                      |                     | Conv 5-3  | Conv2d $3 \times 3$ , LeakyReLU(negative-slope=0.1) | (16,12,32)  |
|                      |                     | Conv 5-4  | Conv2d $3 \times 3$                                 | (16,12,2)   |
|                      | Right Flow Block-2  | Conv 6-1  | Conv2d $3 \times 3$ , LeakyReLU(negative-slope=0.1) | (16,12,128) |
|                      |                     | Conv 6-2  | Conv2d $3 \times 3$ , LeakyReLU(negative-slope=0.1) | (16,12,64)  |
|                      |                     | Conv 6-3  | Conv2d $3 \times 3$ , LeakyReLU(negative-slope=0.1) | (16,12,32)  |
|                      |                     | Conv 6-4  | Conv2d $3 \times 3$                                 | (16,12,2)   |
| Global Parsing Block | Fusion Block        | Conv 7-1  | Conv2d $1 \times 1$                                 | (32,24,256) |
|                      |                     | Res 7-1   | Residual Block                                      | (32,24,256) |
|                      | Parsing Block       | Conv 8-1  | Conv2d $3 \times 3$ , LeakyReLU(negative-slope=0.1) | (32,24,128) |
|                      |                     | Conv 8-2  | Conv2d $3 \times 3$ , LeakyReLU(negative-slope=0.1) | (32,24,64)  |
|                      |                     | Conv 8-3  | Conv2d $3 \times 3$ , LeakyReLU(negative-slope=0.1) | (32,24,32)  |
|                      |                     | Conv 8-4  | Conv2d $3 \times 3$ , Tanh                          | (32,24,7)   |

Table 2. The architecture details of the LFGP block.

| $\mathcal{G}$        |                                                       |                                                       |                                                       |             |
|----------------------|-------------------------------------------------------|-------------------------------------------------------|-------------------------------------------------------|-------------|
| Layer                | Operation                                             | Output Size                                           |                                                       |             |
| Encoder              | Input                                                 | -                                                     | (512,384,37)                                          |             |
|                      | Conv 1-1                                              | Conv2d 3×3, ReLU                                      | (256,192,64)                                          |             |
|                      | Res 1-1                                               | Residual Block (Conv2d 3×3, BN, ReLU, Conv2d 3×3, BN) | (256,192,64)                                          |             |
|                      | Res 1-2                                               | Residual Block (Conv2d 3×3, BN, ReLU, Conv2d 3×3, BN) | (256,192,64)                                          |             |
|                      | Conv 2-1                                              | Conv2d 3×3, BN, ReLU                                  | (128,96,128)                                          |             |
|                      | Res 2-1                                               | Residual Block (Conv2d 3×3, BN, ReLU, Conv2d 3×3, BN) | (128,96,128)                                          |             |
|                      | Res 2-2                                               | Residual Block (Conv2d 3×3, BN, ReLU, Conv2d 3×3, BN) | (128,96,128)                                          |             |
|                      | Conv 3-1                                              | Conv2d 3×3, BN, ReLU                                  | (64,48,256)                                           |             |
|                      | Res 3-1                                               | Residual Block (Conv2d 3×3, BN, ReLU, Conv2d 3×3, BN) | (64,48,256)                                           |             |
|                      | Res 3-2                                               | Residual Block (Conv2d 3×3, BN, ReLU, Conv2d 3×3, BN) | (64,48,256)                                           |             |
|                      | Conv 4-1                                              | Conv2d 3×3, BN, ReLU                                  | (32,24,512)                                           |             |
|                      | Res 4-1                                               | Residual Block (Conv2d 3×3, BN, ReLU, Conv2d 3×3, BN) | (32,24,512)                                           |             |
|                      | Res 4-2                                               | Residual Block (Conv2d 3×3, BN, ReLU, Conv2d 3×3, BN) | (32,24,512)                                           |             |
|                      | Conv 5-1                                              | Conv2d 3×3, ReLU                                      | (16,12,512)                                           |             |
|                      | Res 5-1                                               | Residual Block (Conv2d 3×3, BN, ReLU, Conv2d 3×3, BN) | (16,12,512)                                           |             |
|                      | Res 5-2                                               | Residual Block (Conv2d 3×3, BN, ReLU, Conv2d 3×3, BN) | (16,12,512)                                           |             |
|                      | Decoder                                               | Conv 6-1                                              | Upsample, Conv2d 3×3, BN, ReLU                        | (32,24,512) |
|                      |                                                       | Res 6-1                                               | Residual Block (Conv2d 3×3, BN, ReLU, Conv2d 3×3, BN) | (32,24,512) |
| Res 6-2              |                                                       | Residual Block (Conv2d 3×3, BN, ReLU, Conv2d 3×3, BN) | (32,24,512)                                           |             |
| Skip Connection 7-1  |                                                       | Skip Connection from Res 4-2 (Concatenation)          | (32,24,1024)                                          |             |
| Conv 7-1             |                                                       | Upsample, Conv2d 3×3, BN, ReLU                        | (64,48,256)                                           |             |
| Res 7-1              |                                                       | Residual Block (Conv2d 3×3, BN, ReLU, Conv2d 3×3, BN) | (64,48,256)                                           |             |
| Res 7-2              |                                                       | Residual Block (Conv2d 3×3, BN, ReLU, Conv2d 3×3, BN) | (64,48,256)                                           |             |
| Skip Connection 8-1  |                                                       | Skip Connection from Res 3-2 (Concatenation)          | (64,48,512)                                           |             |
| Conv 8-1             |                                                       | Upsample, Conv2d 3×3, BN, ReLU                        | (128,96,128)                                          |             |
| Res 8-1              |                                                       | Residual Block (Conv2d 3×3, BN, ReLU, Conv2d 3×3, BN) | (128,96,128)                                          |             |
| Res 8-2              |                                                       | Residual Block (Conv2d 3×3, BN, ReLU, Conv2d 3×3, BN) | (128,96,128)                                          |             |
| Skip Connection 9-1  |                                                       | Skip Connection from Res 2-2 (Concatenation)          | (128,96,256)                                          |             |
| Conv 9-1             |                                                       | Upsample, Conv2d 3×3, BN, ReLU                        | (256,192,64)                                          |             |
| Res 9-1              |                                                       | Residual Block (Conv2d 3×3, BN, ReLU, Conv2d 3×3, BN) | (256,192,64)                                          |             |
| Res 9-2              | Residual Block (Conv2d 3×3, BN, ReLU, Conv2d 3×3, BN) | (256,192,64)                                          |                                                       |             |
| Skip Connection 10-1 | Skip Connection from Res 1-2 (Concatenation)          | (256,192,128)                                         |                                                       |             |
| Conv 10-1            | Upsample, Conv2d 3×3                                  | (512,384,4)                                           |                                                       |             |

Table 3. The architecture details of the generator  $\mathcal{G}$ .
